# Supplementary material for: Tracking Marine Heatwaves in the Balearic Sea: Temperature Trends and the Role of Detection Methods
Source: Copernicus journal article supplement (doi:10.5194/egusphere-2024-4065), 2025-01-22
Supplement: Supplementary file 1 [file egusphere-2024-4065-supplement.pdf]

Supplement material to:

# Tracking Marine Heatwaves in the Balearic Sea: Temperature Trends and the Role of Detection Methods

Blanca Fernández-Álvarez, Bàrbara Barceló-Llull, Ananda Pascual

5

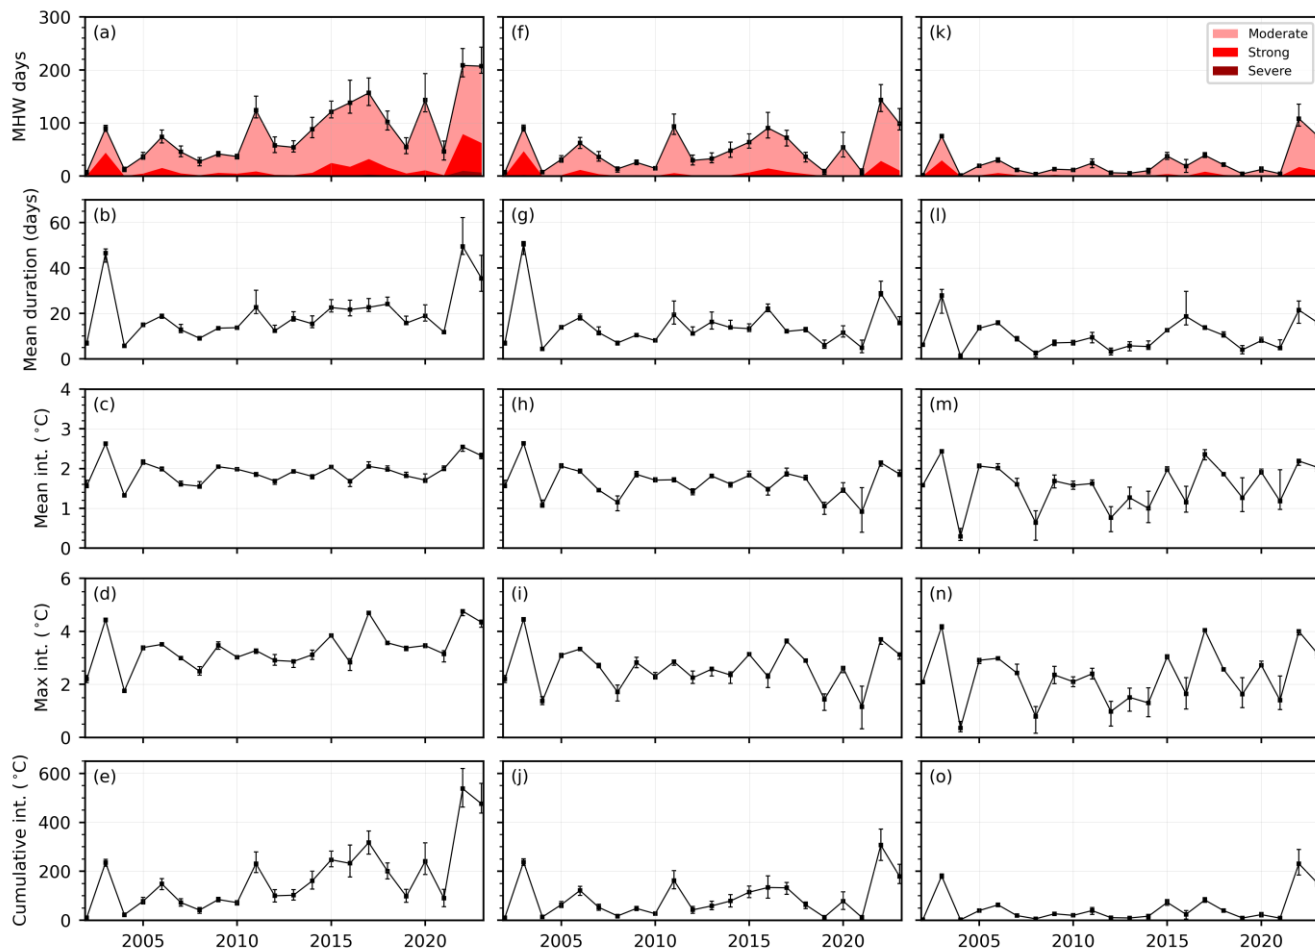

**Figure S1: Spatially averaged metrics of MHWs detected in the Balearic Sea from 2002 to 2023 using (a-e) a fixed baseline, (f-j) a moving baseline and (k-o) detrended data. (a, f, k) Annual number of MHW days. The colours indicate the category of the MHW, with darker colours representing more intense MHWs. (b, g, l) Annual mean duration of the MHW events. (c, h, m) Annually averaged mean intensity of MHW events. (d, i, n) Annually averaged maximum intensity of MHW events. (e, j, o) Annually averaged cumulative intensity of MHW events.**

10

**Table S1. Spatially averaged MHW days and annually averaged mean duration of MHWs detected in the Balearic Sea between 2002 and 2023 using a fixed baseline, moving baseline and detrended data.**

| Year        | MHW days |        |           | Mean duration (days) |        |           |
|-------------|----------|--------|-----------|----------------------|--------|-----------|
|             | Fixed    | Moving | Detrended | Fixed                | Moving | Detrended |
| <b>2002</b> | 6.79     | 6.79   | 1.47      | 6.78                 | 6.78   | 6.12      |
| <b>2003</b> | 89.673   | 90.34  | 75.37     | 46.57                | 50.47  | 27.88     |
| <b>2004</b> | 12.73    | 7.42   | 1.09      | 5.75                 | 4.35   | 1.24      |
| <b>2005</b> | 36.63    | 31.03  | 19.19     | 14.86                | 13.83  | 13.44     |
| <b>2006</b> | 73.86    | 62.04  | 30.47     | 18.95                | 18.20  | 15.72     |
| <b>2007</b> | 45.46    | 35.88  | 11.20     | 12.81                | 11.53  | 8.59      |
| <b>2008</b> | 27.38    | 13.47  | 3.39      | 9.04                 | 7.01   | 2.42      |
| <b>2009</b> | 41.55    | 25.64  | 12.83     | 13.48                | 10.42  | 6.99      |
| <b>2010</b> | 36.71    | 14.53  | 11.49     | 13.70                | 8.06   | 7.21      |
| <b>2011</b> | 124.28   | 93.55  | 24.25     | 22.68                | 19.42  | 9.40      |
| <b>2012</b> | 57.61    | 29.39  | 6.11      | 12.34                | 11.11  | 3.25      |
| <b>2013</b> | 54.08    | 32.52  | 5.13      | 17.83                | 16.27  | 5.75      |
| <b>2014</b> | 88.16    | 47.80  | 10.09     | 15.42                | 13.76  | 5.39      |
| <b>2015</b> | 121.12   | 63.72  | 37.45     | 22.55                | 13.28  | 12.65     |
| <b>2016</b> | 138.29   | 90.60  | 18.76     | 21.70                | 22.06  | 18.65     |
| <b>2017</b> | 156.65   | 72.29  | 39.01     | 22.65                | 12.06  | 13.64     |
| <b>2018</b> | 101.84   | 36.43  | 21.10     | 24.10                | 12.85  | 10.36     |
| <b>2019</b> | 54.38    | 8.55   | 4.07      | 15.71                | 5.99   | 3.97      |
| <b>2020</b> | 143.17   | 54.22  | 12.14     | 18.87                | 11.54  | 7.98      |
| <b>2021</b> | 46.17    | 7.91   | 4.24      | 11.75                | 4.84   | 4.7       |
| <b>2022</b> | 208.57   | 143.44 | 108.25    | 49.45                | 28.79  | 21.47     |
| <b>2023</b> | 207.13   | 98.86  | 75.74     | 35.36                | 15.75  | 15.92     |

**Table S2. Spatially averaged annual mean, maximum and cumulative intensity of MHWs detected in the Balearic Sea between 2002 and 2023 using a fixed baseline, moving baseline and detrended data.**

| Year        | Mean intensity (°C) |        |       | Maximum intensity (°C) |        |       | Cumulative intensity (°C) |        |        |
|-------------|---------------------|--------|-------|------------------------|--------|-------|---------------------------|--------|--------|
|             | Fixed               | Moving | Detr. | Fixed                  | Moving | Detr. | Fixed                     | Moving | Detr.  |
| <b>2002</b> | 1.56                | 1.56   | 1.58  | 2.20                   | 2.20   | 2.09  | 10.29                     | 10.29  | 2.26   |
| <b>2003</b> | 2.62                | 2.64   | 2.44  | 4.44                   | 4.46   | 4.19  | 235.29                    | 238.02 | 180.49 |
| <b>2004</b> | 1.33                | 1.08   | 0.29  | 1.75                   | 1.37   | 0.36  | 22.46                     | 13.26  | 1.79   |
| <b>2005</b> | 2.15                | 2.06   | 2.06  | 3.39                   | 3.11   | 2.91  | 77.95                     | 63.11  | 39.38  |
| <b>2006</b> | 1.98                | 1.93   | 2.01  | 3.51                   | 3.33   | 2.98  | 148.01                    | 121.40 | 62.66  |
| <b>2007</b> | 1.60                | 1.46   | 1.61  | 2.99                   | 2.69   | 2.43  | 72.41                     | 52.43  | 18.82  |
| <b>2008</b> | 1.56                | 1.15   | 0.64  | 2.50                   | 1.71   | 0.79  | 41.36                     | 17.42  | 5.78   |
| <b>2009</b> | 2.05                | 1.86   | 1.69  | 3.47                   | 2.83   | 2.36  | 84.47                     | 48.02  | 26.12  |
| <b>2010</b> | 1.98                | 1.71   | 1.58  | 3.02                   | 2.31   | 2.10  | 71.83                     | 26.51  | 19.70  |
| <b>2011</b> | 1.86                | 1.72   | 1.62  | 3.28                   | 2.85   | 2.40  | 231.26                    | 162.60 | 39.23  |
| <b>2012</b> | 1.69                | 1.43   | 0.76  | 2.90                   | 2.25   | 0.98  | 99.71                     | 58.40  | 9.10   |
| <b>2013</b> | 1.93                | 1.81   | 1.27  | 2.87                   | 2.57   | 1.51  | 102.26                    | 58.40  | 16.37  |
| <b>2014</b> | 1.80                | 1.61   | 1.00  | 3.12                   | 2.35   | 1.30  | 161.07                    | 78.54  | 16.37  |
| <b>2015</b> | 2.04                | 1.83   | 1.97  | 3.84                   | 3.13   | 3.05  | 246.85                    | 114.54 | 72.78  |
| <b>2016</b> | 1.68                | 1.48   | 1.16  | 2.83                   | 2.29   | 1.64  | 232.43                    | 133.70 | 24.01  |
| <b>2017</b> | 2.06                | 1.87   | 2.35  | 4.69                   | 3.63   | 4.04  | 317.47                    | 132.34 | 82.50  |
| <b>2018</b> | 1.98                | 1.76   | 1.86  | 3.57                   | 2.90   | 2.56  | 200.48                    | 63.20  | 39.05  |
| <b>2019</b> | 1.81                | 1.05   | 1.26  | 3.38                   | 1.43   | 1.63  | 97.54                     | 12.48  | 8.98   |
| <b>2020</b> | 1.71                | 1.47   | 1.91  | 3.46                   | 2.62   | 2.73  | 240.86                    | 78.11  | 22.65  |
| <b>2021</b> | 1.99                | 0.92   | 1.18  | 3.15                   | 1.16   | 1.40  | 90.03                     | 11.21  | 8.47   |
| <b>2022</b> | 2.55                | 2.15   | 2.19  | 4.76                   | 3.70   | 4.00  | 537.75                    | 306.83 | 231.10 |
| <b>2023</b> | 2.32                | 1.86   | 2.03  | 4.34                   | 3.13   | 3.16  | 475.61                    | 178.90 | 150.89 |
